# Supplementary material
Source: PubMed Central journal article supplement (PMC10634778)

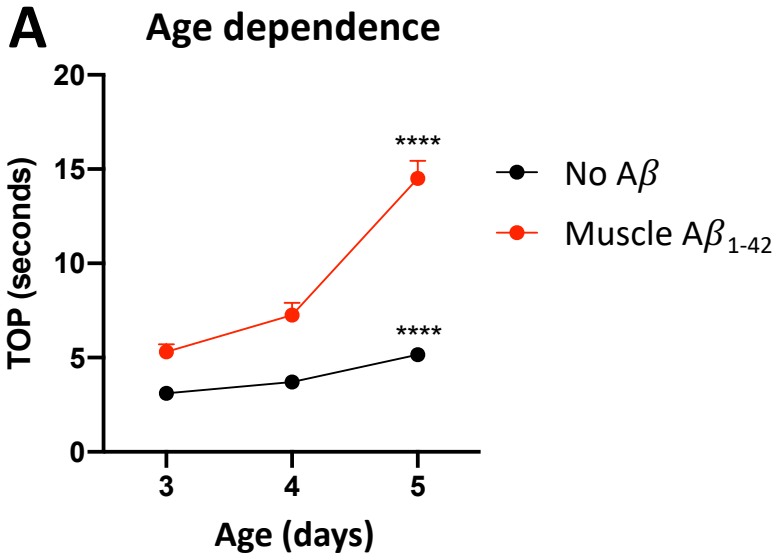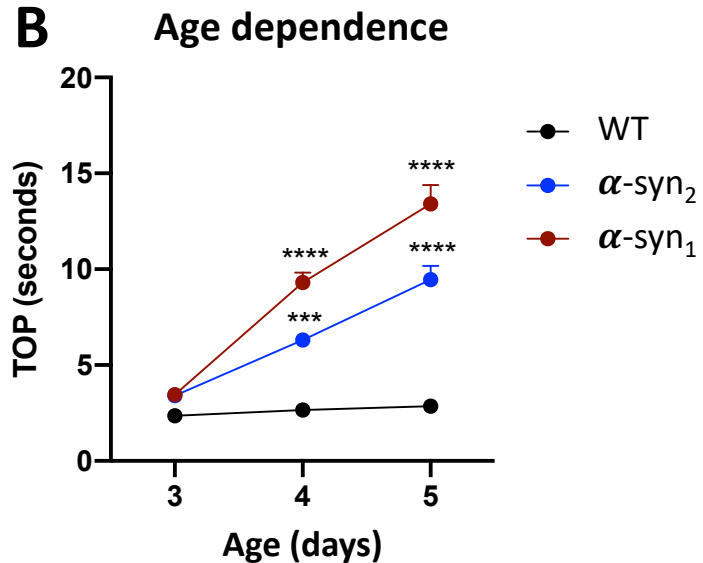

Supplement: media-3.pdf [file media-3.pdf]
