# Supplementary material
Source: PubMed Central journal article supplement (PMC10634778)

# The effect of *P. corporis* on TSA $\Delta$ motility

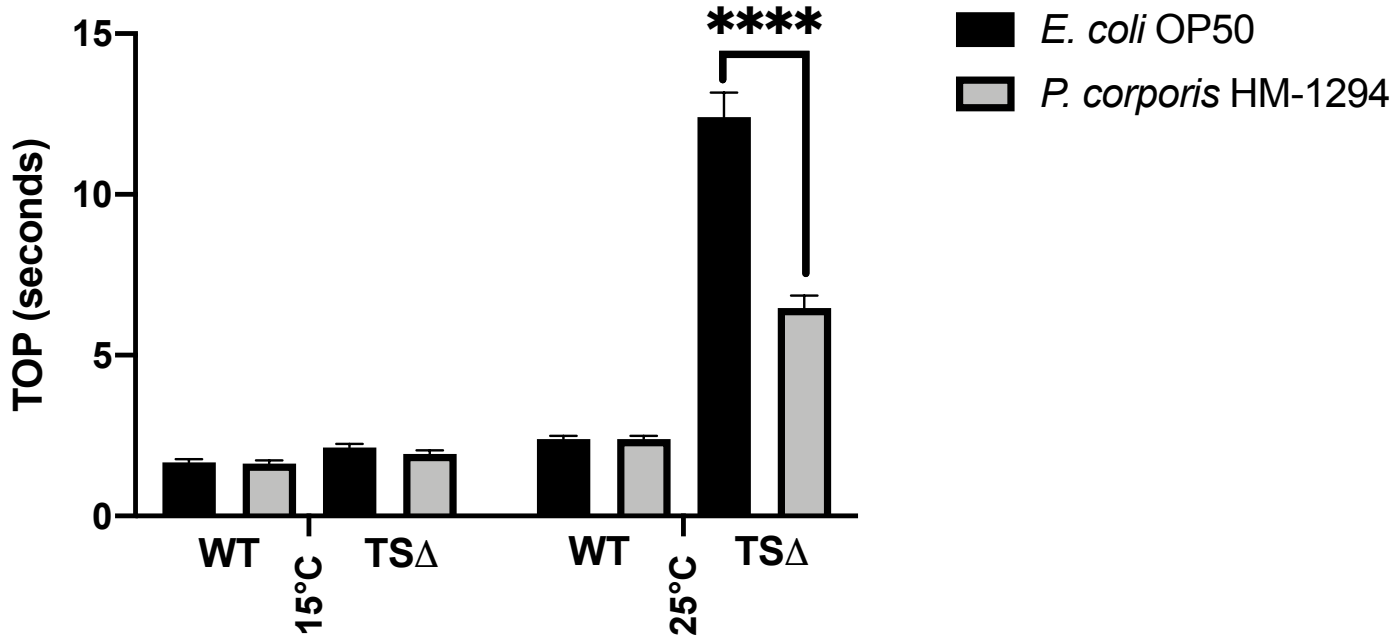

Supplement: media-4.pdf [file media-4.pdf]
