# Supplementary material
Source: PubMed Central journal article supplement (PMC10634778)
Supplement: media-5.pdf [file media-5.pdf]

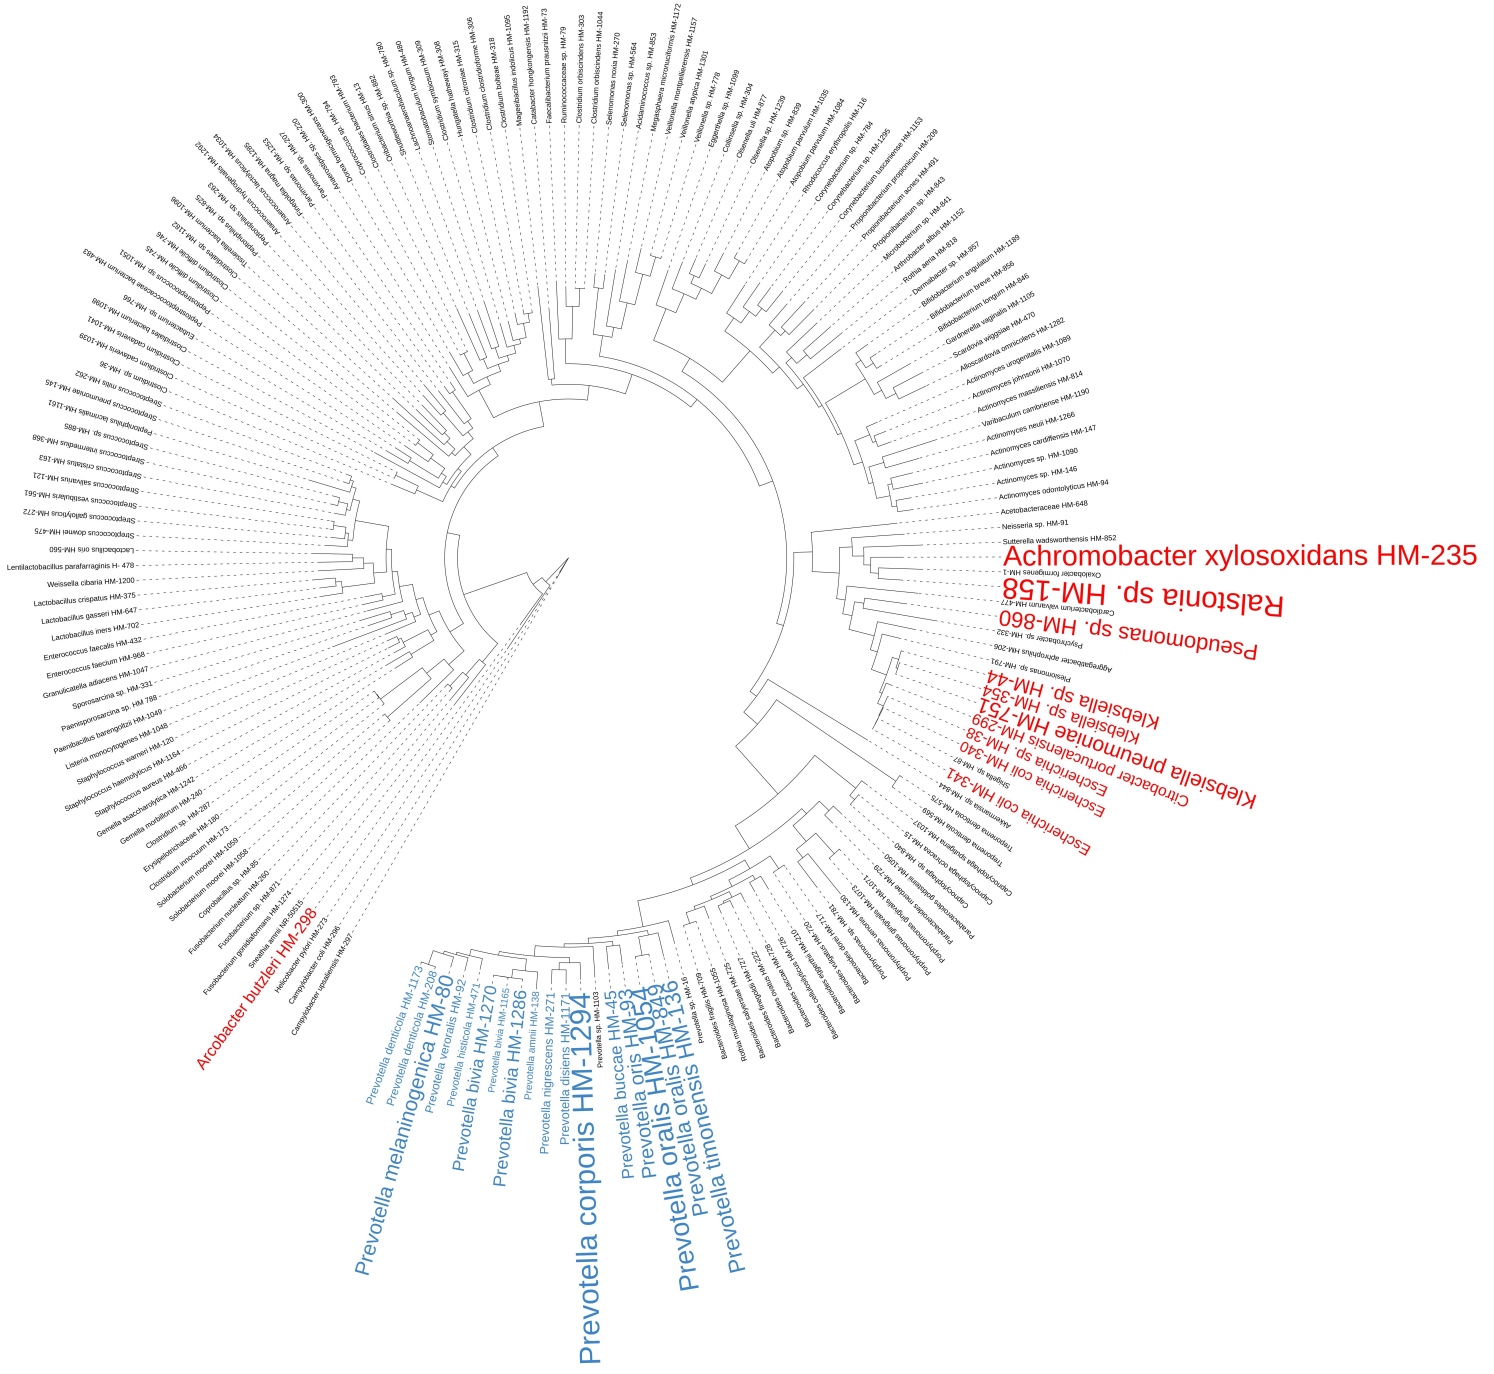

**Accobacter buzleri** HM-298  
Pseudomonas sp. HM-322  
Chryseobacterium sp. HM-323  
Corynebacterium sp. HM-324

**Prevotella melaninogenica** HM-1173  
Prevotella dentitollia HM-1173  
Prevotella dentitollia HM-206  
Prevotella veroralis HM-92

**Prevotella divia** HM-1270  
Prevotella bivia HM-1270  
Prevotella bivia HM-1266  
Prevotella amarii HM-1266

**Prevotella corporis** HM-1294  
Prevotella nigrescens HM-271  
Prevotella distans HM-1171  
Prevotella distans HM-1172

**Prevotella oralis** HM-1054  
Prevotella oralis HM-829  
Prevotella oralis HM-136  
Prevotella timonensis HM-319

**Prevotella buccae** HM-45  
Prevotella otitis HM-93  
Prevotella otitis HM-1054  
Prevotella otitis HM-1054

**Achromobacter xylosoxidans** HM-235  
**Ralstonia** sp. HM-158  
**Pseudomonas** sp. HM-860  
**Klebsiella pneumoniae** HM-754  
**Klebsiella** sp. HM-354  
**Klebsiella** sp. HM-44  
**Citrobacter pneumoniae** HM-340  
**Escherichia coli** HM-341  
**Escherichia coli** HM-341  
**Escherichia coli** HM-341
